# Supplementary material for: Comparative Analyses of the Chloroplast Genomes of Patchouli Plants and Their Relatives in Pogostemon (Lamiaceae)
Source: PubMed Central journal article supplement (PMC7694494; doi:10.3390/plants9111497), 2020-11-05
Supplement: plants-09-01497-s001.pdf [file plants-09-01497-s001.pdf]

## Supplementary Materials

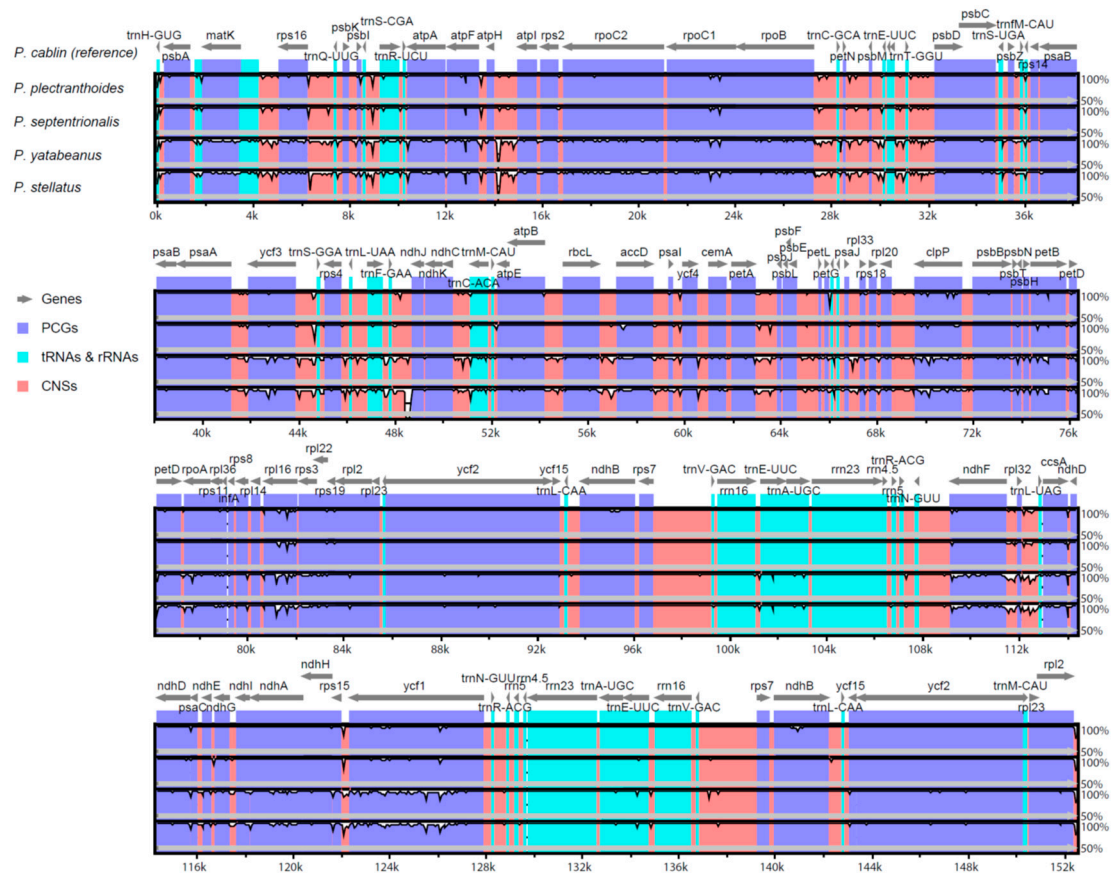

**Figure S1.** mVISTA plot showing the percent identity of plastid genomes between each of four *Pogostemon* species and the reference *Pogostemon cablin* based on pairwise global sequence alignments. The grey arrows at the top of the graph indicate annotated genes with their locations and orientations. Colored peaks (dark blue, protein-coding gene; light blue, tRNAs and rRNAs; pink, conserved non-coding sequences) indicate regions with at least 50% similarity calculated from 50 bp sliding windows.

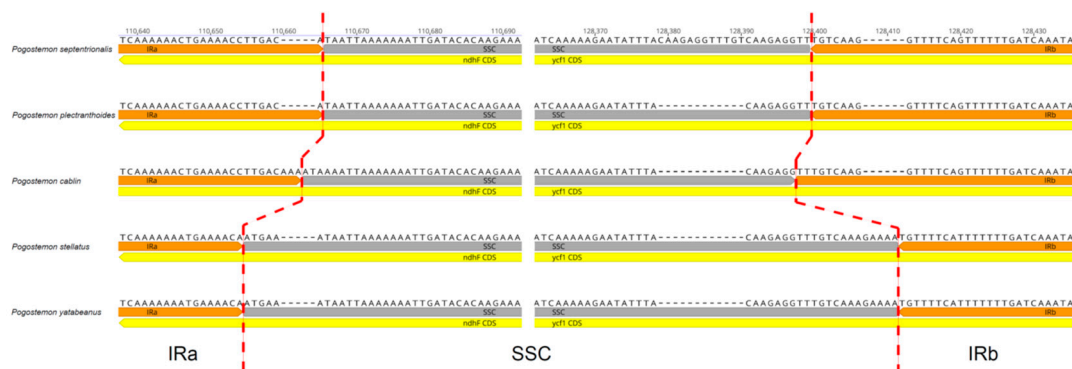

**Figure S2.** IRA-SSC and SSC-IRb boundaries in five *Pogostemon* chloroplast genomes.

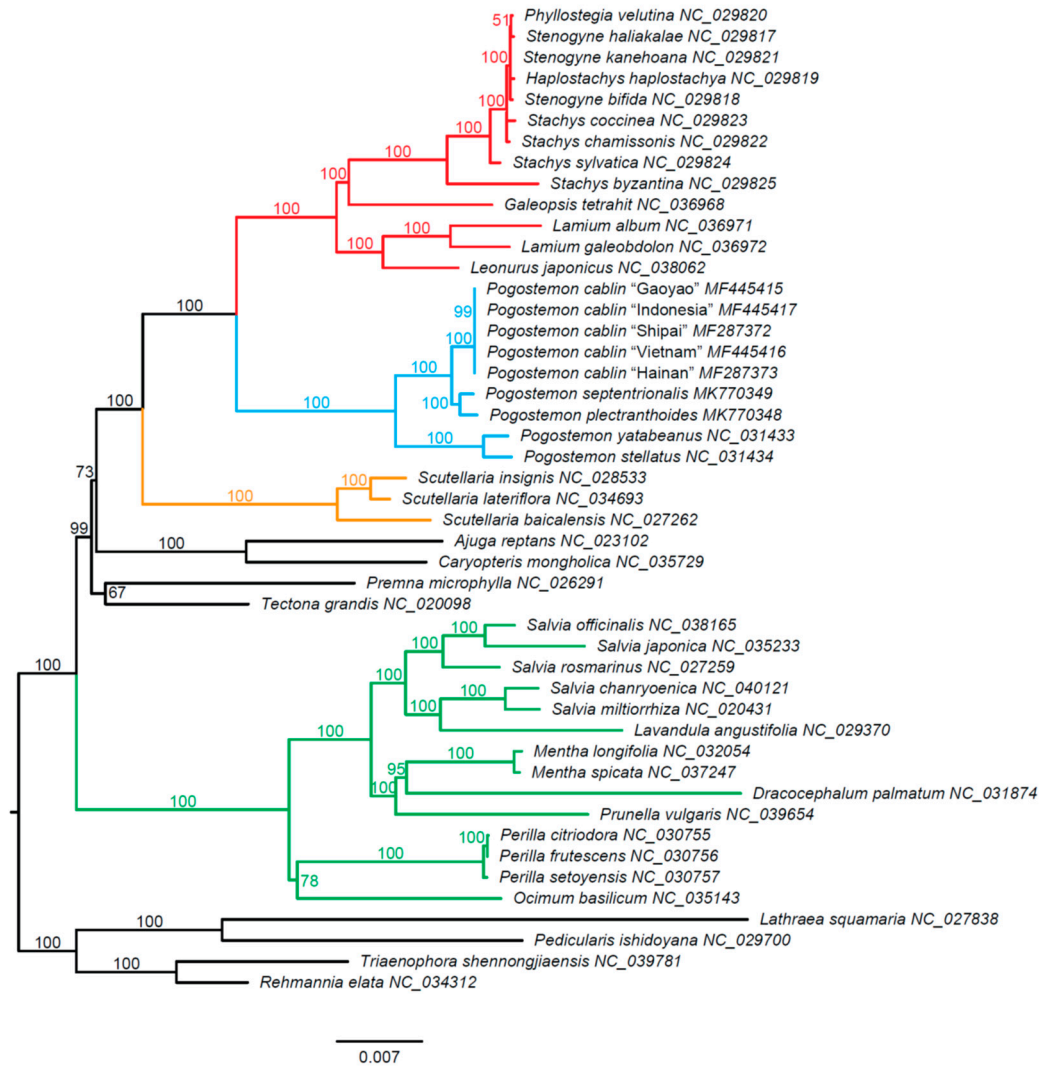

**Figure S3.** Maximum likelihood tree of 43 Lamiaceae accessions and four outgroups inferred from a concatenated codon matrix of 80 plastid protein-coding genes with gene partitions. Red clade: Stachydeae + *Galeopsis* + Lamieae + Leonureae, blue clade: *Pogostemon*, yellow clade: Scutellarioideae, and green clade: Nepetoideae. The group with red and blue colors is the Lamioideae. Numbers on the branches are bootstrap support values.

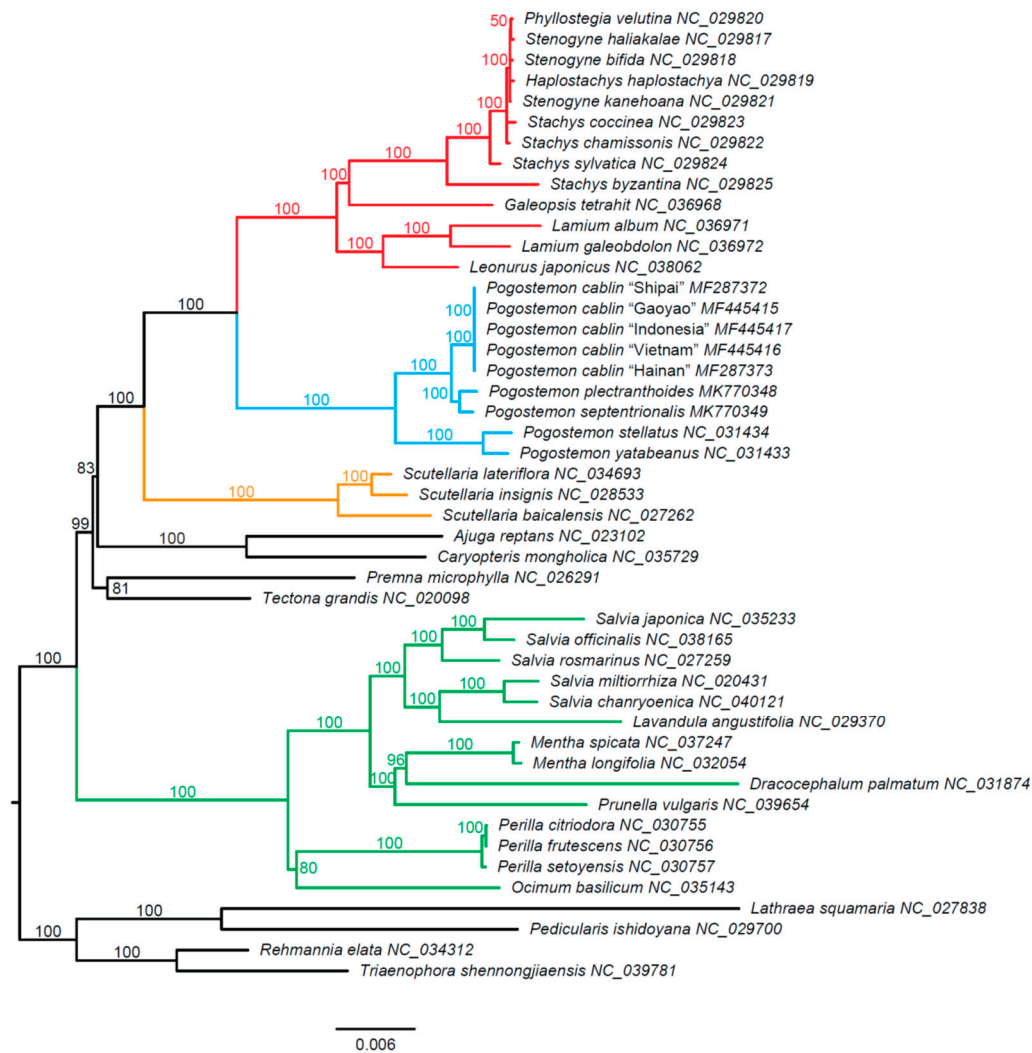

**Figure S4.** Maximum likelihood tree of 43 Lamiaceae accessions and four outgroups inferred from a concatenated codon supermatrix of 80 plastid protein-coding genes without partitions. Red clade: Stachydeae + *Galeopsis* + Lamieae + Leonureae, blue clade: *Pogostemon*, yellow clade: Scutellarioideae, and green clade: Nepetoideae. The group with red and blue colors is the Lamioideae. Numbers on the branches are bootstrap support values.

**Table S1.** Number of phylogenetically informative characters (PICs), and  $d_N$ ,  $d_s$  and  $\omega$  values, for each protein-coding gene.

| Gene        | PICs | $d_N$  | $d_s$  | $\omega$ |
|-------------|------|--------|--------|----------|
| <i>accD</i> | 18   | 0.0106 | 0.0781 | 0.1356   |
| <i>atpA</i> | 14   | 0.0026 | 0.0613 | 0.0417   |
| <i>atpB</i> | 12   | 0.0018 | 0.0540 | 0.0341   |
| <i>atpE</i> | 4    | 0.0097 | 0.0249 | 0.3901   |
| <i>atpF</i> | 11   | 0.0092 | 0.0578 | 0.1600   |
| <i>atpH</i> | 0    | 0      | 0.0334 | 0.0001   |
| <i>atpI</i> | 3    | 0.0075 | 0.0218 | 0.3414   |

|              |    |        |        |        |
|--------------|----|--------|--------|--------|
| <i>ccsA</i>  | 17 | 0.0321 | 0.0467 | 0.6867 |
| <i>cemA</i>  | 12 | 0.0221 | 0.0316 | 0.7002 |
| <i>clpP</i>  | 10 | 0.0121 | 0.0459 | 0.2638 |
| <i>infA</i>  | 3  | 0      | 0.1    | 0.0001 |
| <i>matK</i>  | 44 | 0.0341 | 0.0791 | 0.4317 |
| <i>ndhA</i>  | 14 | 0.0072 | 0.0655 | 0.1098 |
| <i>ndhB</i>  | 1  | 0.0054 | 0.0051 | 1.0682 |
| <i>ndhC</i>  | 3  | 0.0099 | 0.0544 | 0.1825 |
| <i>ndhD</i>  | 12 | 0.0026 | 0.0561 | 0.0458 |
| <i>ndhE</i>  | 1  | 0.0084 | 0.0357 | 0.2351 |
| <i>ndhF</i>  | 47 | 0.0283 | 0.1019 | 0.2781 |
| <i>ndhG</i>  | 3  | 0.016  | 0.0346 | 0.4630 |
| <i>ndhH</i>  | 9  | 0.0033 | 0.0621 | 0.0528 |
| <i>ndhI</i>  | 7  | 0.0051 | 0.0609 | 0.0832 |
| <i>ndhJ</i>  | 1  | 0.0026 | 0.051  | 0.0502 |
| <i>ndhK</i>  | 4  | 0.0076 | 0.0222 | 0.3417 |
| <i>petA</i>  | 5  | 0.0041 | 0.0436 | 0.0935 |
| <i>petB</i>  | 4  | 0.0039 | 0.0397 | 0.0991 |
| <i>petD</i>  | 3  | 0.0029 | 0.0425 | 0.0683 |
| <i>petG</i>  | 0  | 0      | 0      | -      |
| <i>petL</i>  | 1  | 0      | 0.042  | 0.0001 |
| <i>petN</i>  | 0  | 0      | 0      | -      |
| <i>psaA</i>  | 9  | 0      | 0.0334 | 0.0001 |
| <i>psaB</i>  | 13 | 0.0012 | 0.0565 | 0.0205 |
| <i>psaC</i>  | 0  | 0      | 0      | -      |
| <i>psaI</i>  | 3  | 0.025  | 0.0409 | 0.6101 |
| <i>psaJ</i>  | 0  | 0      | 0.0382 | 0.0001 |
| <i>psbA</i>  | 5  | 0      | 0.0571 | 0.0001 |
| <i>psbB</i>  | 15 | 0.0061 | 0.047  | 0.1294 |
| <i>psbC</i>  | 12 | 0      | 0.0486 | 0.0001 |
| <i>psbD</i>  | 6  | 0.0014 | 0.0277 | 0.0490 |
| <i>psbE</i>  | 0  | 0      | 0      | -      |
| <i>psbF</i>  | 1  | 0.0118 | 0.0333 | 0.3558 |
| <i>psbH</i>  | 7  | 0.0384 | 0.0593 | 0.6482 |
| <i>psbI</i>  | 1  | 0      | 0.0609 | 0.0001 |
| <i>psbJ</i>  | 0  | 0      | 0      | -      |
| <i>psbK</i>  | 2  | 0.0124 | 0.0457 | 0.2715 |
| <i>psbL</i>  | 2  | 0.0149 | 0.025  | 0.5955 |
| <i>psbM</i>  | 1  | 0      | 0.0437 | 0.0001 |
| <i>psbN</i>  | 1  | 0      | 0.0247 | 0.0001 |
| <i>psbT</i>  | 0  | 0      | 0.0506 | 0.0001 |
| <i>psbZ</i>  | 2  | 0      | 0.064  | 0.0001 |
| <i>rbcL</i>  | 21 | 0.0078 | 0.0493 | 0.1577 |
| <i>rpl14</i> | 2  | 0.0035 | 0.0275 | 0.1266 |

|              |     |        |        |        |
|--------------|-----|--------|--------|--------|
| <i>rpl16</i> | 6   | 0.0061 | 0.0731 | 0.0836 |
| <i>rpl2</i>  | 0   | 0      | 0.0065 | 0.0001 |
| <i>rpl20</i> | 5   | 0.0136 | 0.0736 | 0.1846 |
| <i>rpl22</i> | 10  | 0.0158 | 0.1454 | 0.1089 |
| <i>rpl23</i> | 0   | 0.0044 | 0      | -      |
| <i>rpl32</i> | 3   | 0.0093 | 0.0937 | 0.0992 |
| <i>rpl33</i> | 0   | 0.0128 | 0.0519 | 0.2470 |
| <i>rpl36</i> | 0   | 0      | 0.0504 | 0.0001 |
| <i>rpoA</i>  | 13  | 0.0197 | 0.0623 | 0.3158 |
| <i>rpoB</i>  | 30  | 0.0073 | 0.0422 | 0.1733 |
| <i>rpoC1</i> | 17  | 0.0057 | 0.0425 | 0.1347 |
| <i>rpoC2</i> | 58  | 0.0179 | 0.0582 | 0.3071 |
| <i>rps11</i> | 6   | 0.0032 | 0.1037 | 0.0313 |
| <i>rps12</i> | 0   | 0      | 0.0207 | 0.0001 |
| <i>rps14</i> | 3   | 0.0044 | 0.0425 | 0.1028 |
| <i>rps15</i> | 3   | 0.0043 | 0.0943 | 0.0461 |
| <i>rps16</i> | 6   | 0.0224 | 0.0941 | 0.2381 |
| <i>rps18</i> | 8   | 0.0124 | 0.0994 | 0.1244 |
| <i>rps19</i> | 3   | 0      | 0.0931 | 0.0001 |
| <i>rps2</i>  | 5   | 0.0096 | 0.0412 | 0.2338 |
| <i>rps3</i>  | 13  | 0.0098 | 0.1188 | 0.0824 |
| <i>rps4</i>  | 5   | 0.0089 | 0.0275 | 0.3236 |
| <i>rps7</i>  | 0   | 0      | 0.0208 | 0.0001 |
| <i>rps8</i>  | 1   | 0.0157 | 0      | -      |
| <i>ycf1</i>  | 146 | 0.0435 | 0.0605 | 0.7186 |
| <i>ycf15</i> | 1   | 0.0081 | 0      | -      |
| <i>ycf2</i>  | 23  | 0.0057 | 0.0072 | 0.7870 |
| <i>ycf3</i>  | 1   | 0      | 0.0168 | 0.0001 |
| <i>ycf4</i>  | 4   | 0.0050 | 0.0142 | 0.3542 |

**Table S2.** Mean  $d_N$ ,  $d_s$  and  $\omega$  values for each group of protein-coding genes.

| Gene Group | $d_N$  | $d_s$  | $\omega$ |
|------------|--------|--------|----------|
| All        | 0.0080 | 0.0467 | 0.1704   |
| <i>atp</i> | 0.0051 | 0.0422 | 0.1216   |
| <i>ndh</i> | 0.0088 | 0.0500 | 0.1754   |
| <i>pet</i> | 0.0018 | 0.0280 | 0.0650   |
| <i>psa</i> | 0.0052 | 0.0338 | 0.1550   |
| <i>psb</i> | 0.0057 | 0.0392 | 0.1447   |
| <i>rpl</i> | 0.0073 | 0.0580 | 0.1255   |
| <i>rpo</i> | 0.0127 | 0.0513 | 0.2466   |
| <i>rps</i> | 0.0076 | 0.0630 | 0.1200   |
| <i>ycf</i> | 0.0125 | 0.0197 | 0.6312   |

**Table S3.** Samples used for chloroplast phylogenomic analyses in this study.

| Species                     | Taxonomy                              | GenBank Accession Number |
|-----------------------------|---------------------------------------|--------------------------|
| <i>Pogostemon</i>           | Lamiaceae; Lamioideae; Pogostemoneae; | MK770348                 |
| <i>plectranthoides</i>      | Pogostemon                            |                          |
| <i>Pogostemon</i>           | Lamiaceae; Lamioideae; Pogostemoneae; | MK770349                 |
| <i>septentrionalis</i>      | Pogostemon                            |                          |
| <i>Pogostemon stellatus</i> | Lamiaceae; Lamioideae; Pogostemoneae; | KP718620                 |
|                             | Pogostemon                            |                          |
| <i>Pogostemon</i>           | Lamiaceae; Lamioideae; Pogostemoneae; | KP718618                 |
| <i>yatabeanus</i>           | Pogostemon                            |                          |
| <i>Pogostemon cablin</i>    | Lamiaceae; Lamioideae; Pogostemoneae; |                          |
| “Indonesia”                 | Pogostemon                            | MF445417                 |
| <i>Pogostemon cablin</i>    | Lamiaceae; Lamioideae; Pogostemoneae; |                          |
| “Vietnam”                   | Pogostemon                            | MF445416                 |
| <i>Pogostemon cablin</i>    | Lamiaceae; Lamioideae; Pogostemoneae; |                          |
| “Gaoyao”                    | Pogostemon                            | MF445415                 |
| <i>Pogostemon cablin</i>    | Lamiaceae; Lamioideae; Pogostemoneae; |                          |
| “Shipai”                    | Pogostemon                            | MF287372                 |
| <i>Pogostemon cablin</i>    | Lamiaceae; Lamioideae; Pogostemoneae; |                          |
| “Hainan”                    | Pogostemon                            | MF287373                 |
| <i>Premna microphylla</i>   | Lamiaceae; Lamiaceae incertae sedis;  | NC_026291.1              |
|                             | Premna                                |                          |
| <i>Tectona grandis</i>      | Lamiaceae; Lamiaceae incertae sedis;  | NC_020098.1              |
|                             | Tectona                               |                          |

---

|                                      |                                                                |             |
|--------------------------------------|----------------------------------------------------------------|-------------|
| <i>Lamium album</i>                  | Lamiaceae; Lamioideae; Lamieae; Lamium                         | NC_036971.1 |
| <i>Lamium galeobdolon</i>            | Lamiaceae; Lamioideae; Lamieae; Lamium                         | NC_036972.1 |
| <i>Galeopsis tetrahit</i>            | Lamiaceae; Lamioideae; Lamioideae<br>incertae sedis; Galeopsis | NC_036968.1 |
| <i>Leonurus japonicus</i>            | Lamiaceae; Lamioideae; Leonureae;<br>Leonurus                  | NC_038062.1 |
| <i>Haplostachys<br/>haplostachya</i> | Lamiaceae; Lamioideae; Stachydeae;<br>Haplostachys             | NC_029819.1 |
| <i>Phyllostegia velutina</i>         | Lamiaceae; Lamioideae; Stachydeae;<br>Phyllostegia             | NC_029820.1 |
| <i>Stachys byzantine</i>             | Lamiaceae; Lamioideae; Stachydeae;<br>Stachys                  | NC_029825.1 |
| <i>Stachys chamissonis</i>           | Lamiaceae; Lamioideae; Stachydeae;<br>Stachys                  | NC_029822.1 |
| <i>Stachys coccinea</i>              | Lamiaceae; Lamioideae; Stachydeae;<br>Stachys                  | NC_029823.1 |
| <i>Stachys sylvatica</i>             | Lamiaceae; Lamioideae; Stachydeae;<br>Stachys                  | NC_029824.1 |
| <i>Stenogyne bifida</i>              | Lamiaceae; Lamioideae; Stachydeae;<br>Stenogyne                | NC_029818.1 |
| <i>Stenogyne haliakalae</i>          | Lamiaceae; Lamioideae; Stachydeae;<br>Stenogyne                | NC_029817.1 |
| <i>Stenogyne kanehoana</i>           | Lamiaceae; Lamioideae; Stachydeae;<br>Stenogyne                | NC_029821.1 |

---

|                                   |                                           |             |
|-----------------------------------|-------------------------------------------|-------------|
| <i>Perilla citriodora</i>         | Lamiaceae; Nepetoideae; Elsholtzieae;     | NC_030755.1 |
|                                   | Perilla                                   |             |
| <i>Perilla frutescens</i>         | Lamiaceae; Nepetoideae; Elsholtzieae;     | NC_030756.1 |
|                                   | Perilla                                   |             |
| <i>Perilla setoyensis</i>         | Lamiaceae; Nepetoideae; Elsholtzieae;     | NC_030757.1 |
|                                   | Perilla                                   |             |
| <i>Lavandula angustifolia</i>     | Lamiaceae; Nepetoideae; Lavanduleae;      | NC_029370.1 |
|                                   | Lavandula                                 |             |
| <i>Dracocephalum<br/>palmatum</i> | Lamiaceae; Nepetoideae; Mentheae;         | NC_031874.1 |
|                                   | Dracocephalum                             |             |
| <i>Mentha longifolia</i>          | Lamiaceae; Nepetoideae; Mentheae;         | NC_032054.1 |
|                                   | Mentha                                    |             |
| <i>Mentha spicata</i>             | Lamiaceae; Nepetoideae; Mentheae;         | NC_037247.1 |
|                                   | Mentha                                    |             |
| <i>Prunella vulgaris</i>          | Lamiaceae; Nepetoideae; Mentheae;         | NC_039654.1 |
|                                   | Prunella                                  |             |
| <i>Salvia japonica</i>            | Lamiaceae; Nepetoideae; Mentheae; Salvia  | NC_035233.1 |
| <i>Salvia miltiorrhiza</i>        | Lamiaceae; Nepetoideae; Mentheae; Salvia  | NC_020431.1 |
| <i>Salvia officinalis</i>         | Lamiaceae; Nepetoideae; Mentheae; Salvia  | NC_038165.1 |
| <i>Salvia rosmarinus</i>          | Lamiaceae; Nepetoideae; Mentheae; Salvia; | NC_027259.1 |
|                                   | Rosmarinus                                |             |
| <i>Salvia chanryoenica</i>        | Lamiaceae; Nepetoideae; Mentheae; Salvia; | NC_040121.1 |
|                                   | Salvia unplaced                           |             |
| <i>Ocimum basilicum</i>           | Lamiaceae; Nepetoideae; Ocimeae; Ocimum   | NC_035143.1 |



---

|                                          |                                                              |             |
|------------------------------------------|--------------------------------------------------------------|-------------|
| <i>Scutellaria baicalensis</i>           | Lamiaceae; Scutellarioideae; Scutellaria                     | NC_027262.1 |
| <i>Scutellaria insignis</i>              | Lamiaceae; Scutellarioideae; Scutellaria                     | NC_028533.1 |
| <i>Scutellaria lateriflora</i>           | Lamiaceae; Scutellarioideae; Scutellaria                     | NC_034693.1 |
| <i>Ajuga reptans</i>                     | Lamiaceae; Teucrioideae; Ajuga                               | NC_023102.1 |
| <i>Caryopteris<br/>mongholica</i>        | Lamiaceae; Teucrioideae; Caryopteris                         | NC_035729.1 |
| <i>Lathraea squamaria</i>                | Orobanchaceae; Rhinanthaeae; Lathraea                        | NC_027838.1 |
| <i>Pedicularis ishidoyana</i>            | Orobanchaceae; Pedicularideae; Pedicularis                   | NC_029700.1 |
| <i>Rehmannia elata</i>                   | Orobanchaceae; Orobanchaceae incertae<br>sedis; Rehmannia    | NC_034312.1 |
| <i>Triaenophora<br/>shennongjiaensis</i> | Orobanchaceae; Orobanchaceae incertae<br>sedis; Triaenophora | NC_039781.1 |

---
